# Supplementary material for: Biogenic Amines and Aflatoxins in Some Imported Meat Products: Incidence, Occurrence, and Public Health Impacts
Source: Hindawi journal article supplement (doi:10.1155/2020/8718179), 2020-07-29
Supplement: f1 [file 8718179.f1.zip]

Archive with 2 entries (2 files):
- 8718179.f1/supplementary 1.docx
- 8718179.f1/supplementary 2.docx
